# Supplementary material for: Seizure control does not predict hippocampal subfield volume change in children with focal drug-resistant epilepsy
Source: PubMed Central journal article supplement — Neuroradiol J. 2021 Oct 7;35(4):454–60. doi: 10.1177/19714009211049078 (PMC9437498; doi:10.1177/19714009211049078), 2021-10-07
Supplement: sj-pdf-1-neu-10.1177_19714009211049078.pdf [file sj-pdf-1-neu-10.1177_19714009211049078.pdf]

Dependent Variable: sR.Hippocampal.tail

Unstandardized Coeffi Standardiz Sig.

| Model |                        | Unstandardized Coefficients |            | Standardized Coefficients | t      | Sig.  |
|-------|------------------------|-----------------------------|------------|---------------------------|--------|-------|
|       |                        | B                           | Std. Error | Beta                      |        |       |
| 1     | (Constant)             | 137.867                     | 56.412     |                           | 2.444  | 0.020 |
|       | fR.Hippocampal.tail    | 0.823                       | 0.092      | 0.832                     | 8.925  | 0.000 |
|       | Engel                  | -27.575                     | 11.936     | -0.209                    | -2.310 | 0.028 |
|       | Interval.between.scans | -1.755                      | 4.552      | -0.035                    | -0.385 | 0.703 |
|       | Age.at.MRI             | -0.233                      | 1.562      | -0.014                    | -0.149 | 0.882 |
|       | Severity.baseline      | -1.616                      | 12.489     | -0.012                    | -0.129 | 0.898 |

Dependent Variable: sR.subiculum

Unstandardized Coeffi Standardiz Sig.

| Model |                        | Unstandardized Coefficients |            | Standardized Coefficients | t      | Sig.  |
|-------|------------------------|-----------------------------|------------|---------------------------|--------|-------|
|       |                        | B                           | Std. Error | Beta                      |        |       |
| 1     | (Constant)             | 79.920                      | 61.712     |                           | 1.295  | 0.205 |
|       | Engel                  | -12.551                     | 10.938     | -0.124                    | -1.147 | 0.260 |
|       | Interval.between.scans | -2.650                      | 4.005      | -0.068                    | -0.662 | 0.513 |
|       | Age.at.MRI             | -1.721                      | 1.618      | -0.131                    | -1.064 | 0.296 |
|       | Severity.baseline      | 1.853                       | 11.292     | 0.017                     | 0.164  | 0.871 |
|       | fR.subiculum           | 0.916                       | 0.131      | 0.868                     | 6.976  | 0.000 |

Dependent Variable: sR.CA.one

Unstandardized Coeffi Standardiz Sig.

| Model |                        | Unstandardized Coefficients |            | Standardized Coefficients | t      | Sig.  |
|-------|------------------------|-----------------------------|------------|---------------------------|--------|-------|
|       |                        | B                           | Std. Error | Beta                      |        |       |
| 1     | (Constant)             | 51.281                      | 72.632     |                           | 0.706  | 0.485 |
|       | Engel                  | -20.079                     | 14.349     | -0.111                    | -1.399 | 0.172 |
|       | Interval.between.scans | 1.226                       | 5.224      | 0.018                     | 0.235  | 0.816 |
|       | Age.at.MRI             | -0.940                      | 1.908      | -0.040                    | -0.492 | 0.626 |
|       | Severity.baseline      | 17.981                      | 14.471     | 0.095                     | 1.243  | 0.223 |
|       | fR.CA.one              | 0.929                       | 0.093      | 0.873                     | 10.025 | 0.000 |

Dependent Variable: sR.presubiculum

Unstandardized Coeffi Standardiz Sig.

| Model |                        | Unstandardized Coefficients |            | Standardized Coefficients | t      | Sig.  |
|-------|------------------------|-----------------------------|------------|---------------------------|--------|-------|
|       |                        | B                           | Std. Error | Beta                      |        |       |
| 1     | (Constant)             | 128.402                     | 63.028     |                           | 2.037  | 0.050 |
|       | Engel                  | -17.405                     | 12.626     | -0.191                    | -1.379 | 0.178 |
|       | Interval.between.scans | -5.794                      | 4.434      | -0.167                    | -1.307 | 0.201 |
|       | Age.at.MRI             | -0.347                      | 1.546      | -0.029                    | -0.224 | 0.824 |
|       | Severity.baseline      | 7.286                       | 12.452     | 0.077                     | 0.585  | 0.563 |
|       | fR.presubiculum        | 0.687                       | 0.151      | 0.640                     | 4.550  | 0.000 |

Dependent Variable: sR.parasubiculum

Unstandardized Coeffi Standardiz Sig.

| Model |                        | Unstandardized Coefficients |            | Standardized Coefficients | t      | Sig.  |
|-------|------------------------|-----------------------------|------------|---------------------------|--------|-------|
|       |                        | B                           | Std. Error | Beta                      |        |       |
| 1     | (Constant)             | 69.877                      | 23.562     |                           | 2.966  | 0.006 |
|       | Engel                  | -10.566                     | 4.784      | -0.322                    | -2.208 | 0.035 |
|       | Interval.between.scans | -5.370                      | 1.841      | -0.429                    | -2.917 | 0.007 |
|       | Age.at.MRI             | -0.203                      | 0.590      | -0.048                    | -0.344 | 0.733 |
|       | Severity.baseline      | 1.370                       | 5.005      | 0.040                     | 0.274  | 0.786 |
|       | fR.parasubiculum       | 0.417                       | 0.188      | 0.312                     | 2.218  | 0.034 |

Dependent Variable: sR.molecular.layer.HP      Unstandardized Coeffi Standardiz Sig.

| Model |                        | Unstandardized Coefficients |            | Standardized Coefficients | t      | Sig.  |
|-------|------------------------|-----------------------------|------------|---------------------------|--------|-------|
|       |                        | B                           | Std. Error | Beta                      |        |       |
| 1     | (Constant)             | 136.496                     | 74.904     |                           | 1.822  | 0.078 |
|       | Engel                  | -21.100                     | 13.373     | -0.162                    | -1.578 | 0.125 |
|       | Interval.between.scans | -2.301                      | 4.846      | -0.046                    | -0.475 | 0.638 |
|       | Age.at.MRI             | -0.640                      | 1.894      | -0.038                    | -0.338 | 0.738 |
|       | Severity.baseline      | 8.072                       | 13.579     | 0.059                     | 0.594  | 0.557 |
|       | fR.molecular.layer.HP  | 0.814                       | 0.118      | 0.809                     | 6.907  | 0.000 |

Dependent Variable: sR.GC.ML.DG      Unstandardized Coeffi Standardiz Sig.

| Model |                        | Unstandardized Coefficients |            | Standardized Coefficients | t      | Sig.  |
|-------|------------------------|-----------------------------|------------|---------------------------|--------|-------|
|       |                        | B                           | Std. Error | Beta                      |        |       |
| 1     | (Constant)             | 107.028                     | 37.104     |                           | 2.885  | 0.007 |
|       | Engel                  | -6.449                      | 6.847      | -0.111                    | -0.942 | 0.353 |
|       | Interval.between.scans | 0.453                       | 2.574      | 0.020                     | 0.176  | 0.862 |
|       | Age.at.MRI             | 0.740                       | 1.018      | 0.098                     | 0.727  | 0.473 |
|       | Severity.baseline      | 3.180                       | 7.181      | 0.052                     | 0.443  | 0.661 |
|       | fR.GC.ML.DG            | 0.620                       | 0.117      | 0.706                     | 5.281  | 0.000 |

Dependent Variable: sR.CA.three      Unstandardized Coeffi Standardiz Sig.

| Model |                        | Unstandardized Coefficients |            | Standardized Coefficients | t      | Sig.  |
|-------|------------------------|-----------------------------|------------|---------------------------|--------|-------|
|       |                        | B                           | Std. Error | Beta                      |        |       |
| 1     | (Constant)             | 22.448                      | 24.747     |                           | 0.907  | 0.371 |
|       | Engel                  | -3.256                      | 5.963      | -0.051                    | -0.546 | 0.589 |
|       | Interval.between.scans | 1.578                       | 2.238      | 0.065                     | 0.705  | 0.486 |
|       | Age.at.MRI             | 0.036                       | 0.810      | 0.004                     | 0.044  | 0.965 |
|       | Severity.baseline      | 6.440                       | 6.387      | 0.097                     | 1.008  | 0.321 |
|       | fR.CA.three            | 0.834                       | 0.097      | 0.841                     | 8.595  | 0.000 |

Dependent Variable: sR.CA.four      Unstandardized Coeffi Standardiz Sig.

| Model |                        | Unstandardized Coefficients |            | Standardized Coefficients | t      | Sig.  |
|-------|------------------------|-----------------------------|------------|---------------------------|--------|-------|
|       |                        | B                           | Std. Error | Beta                      |        |       |
| 1     | (Constant)             | 88.179                      | 33.552     |                           | 2.628  | 0.013 |
|       | Engel                  | -4.818                      | 6.065      | -0.098                    | -0.794 | 0.433 |
|       | Interval.between.scans | 0.623                       | 2.268      | 0.033                     | 0.275  | 0.786 |
|       | Age.at.MRI             | 0.498                       | 0.895      | 0.078                     | 0.557  | 0.582 |
|       | Severity.baseline      | 2.931                       | 6.366      | 0.057                     | 0.460  | 0.648 |
|       | fR.CA.four             | 0.625                       | 0.124      | 0.697                     | 5.031  | 0.000 |

Dependent Variable: sR.fimbria

Unstandardized Coeffi Standardiz Sig.

| Model |                        | Unstandardized Coefficients |            | Standardized Coefficients | t      | Sig.  |
|-------|------------------------|-----------------------------|------------|---------------------------|--------|-------|
|       |                        | B                           | Std. Error | Beta                      |        |       |
| 1     | (Constant)             | 15.035                      | 23.158     |                           | 0.649  | 0.521 |
|       | Engel                  | 1.816                       | 5.373      | 0.040                     | 0.338  | 0.738 |
|       | Interval.between.scans | -1.349                      | 1.979      | -0.079                    | -0.682 | 0.501 |
|       | Age.at.MRI             | -0.119                      | 0.645      | -0.021                    | -0.185 | 0.855 |
|       | Severity.baseline      | 1.367                       | 5.484      | 0.029                     | 0.249  | 0.805 |
|       | fR.fimbria             | 0.867                       | 0.130      | 0.784                     | 6.680  | 0.000 |

Dependent Variable: sR.HATA

Unstandardized Coeffi Standardiz Sig.

| Model |                        | Unstandardized Coefficients |            | Standardized Coefficients | t      | Sig.  |
|-------|------------------------|-----------------------------|------------|---------------------------|--------|-------|
|       |                        | B                           | Std. Error | Beta                      |        |       |
| 1     | (Constant)             | 5.384                       | 9.740      |                           | 0.553  | 0.584 |
|       | Engel                  | 0.293                       | 2.047      | 0.016                     | 0.143  | 0.887 |
|       | Interval.between.scans | 1.410                       | 0.740      | 0.206                     | 1.904  | 0.066 |
|       | Age.at.MRI             | -0.246                      | 0.265      | -0.106                    | -0.930 | 0.360 |
|       | Severity.baseline      | 2.267                       | 2.107      | 0.121                     | 1.076  | 0.290 |
|       | fR.HATA                | 0.835                       | 0.120      | 0.824                     | 6.948  | 0.000 |

Dependent Variable: sR.Whole.hippocampus

Unstandardized Coeffi Standardiz Sig.

| Model |                        | Unstandardized Coefficients |            | Standardized Coefficients | t      | Sig.  |
|-------|------------------------|-----------------------------|------------|---------------------------|--------|-------|
|       |                        | B                           | Std. Error | Beta                      |        |       |
| 1     | (Constant)             | 779.802                     | 447.083    |                           | 1.744  | 0.091 |
|       | Engel                  | -122.981                    | 75.601     | -0.169                    | -1.627 | 0.114 |
|       | Interval.between.scans | -13.059                     | 27.728     | -0.047                    | -0.471 | 0.641 |
|       | Age.at.MRI             | -3.587                      | 10.779     | -0.038                    | -0.333 | 0.742 |
|       | Severity.baseline      | 52.691                      | 77.607     | 0.069                     | 0.679  | 0.502 |
|       | fR.Whole.hippocampus   | 0.821                       | 0.123      | 0.798                     | 6.701  | 0.000 |

Dependent Variable: sL.Hippocampal.tail

Unstandardized Coeffi Standardiz Sig.

| Model |                        | Unstandardized Coefficients |            | Standardized Coefficients | t      | Sig.  |
|-------|------------------------|-----------------------------|------------|---------------------------|--------|-------|
|       |                        | B                           | Std. Error | Beta                      |        |       |
| 1     | (Constant)             | 97.557                      | 70.611     |                           | 1.382  | 0.177 |
|       | Engel                  | -5.009                      | 15.047     | -0.035                    | -0.333 | 0.741 |
|       | Interval.between.scans | -1.448                      | 5.903      | -0.027                    | -0.245 | 0.808 |
|       | Age.at.MRI             | 2.161                       | 1.990      | 0.118                     | 1.086  | 0.286 |
|       | Severity.baseline      | 1.242                       | 15.897     | 0.008                     | 0.078  | 0.938 |
|       | fL.Hippocampal.tail    | 0.767                       | 0.111      | 0.793                     | 6.901  | 0.000 |

Dependent Variable: sL.subiculum

Unstandardized Coeffi Standardiz Sig.

| Model |                        | Unstandardized Coefficients |            | Standardized Coefficients | t      | Sig.  |
|-------|------------------------|-----------------------------|------------|---------------------------|--------|-------|
|       |                        | B                           | Std. Error | Beta                      |        |       |
| 1     | (Constant)             | 2.250                       | 51.991     |                           | 0.043  | 0.966 |
|       | Engel                  | -3.331                      | 8.794      | -0.032                    | -0.379 | 0.707 |
|       | Interval.between.scans | 0.411                       | 3.250      | 0.010                     | 0.127  | 0.900 |
|       | Age.at.MRI             | -1.100                      | 1.249      | -0.082                    | -0.880 | 0.385 |
|       | Severity.baseline      | 10.123                      | 9.319      | 0.094                     | 1.086  | 0.286 |
|       | fL.subiculum           | 0.997                       | 0.101      | 0.949                     | 9.854  | 0.000 |

Dependent Variable: sL.CA.one

Unstandardized Coeffi Standardiz Sig.

| Model |                        | Unstandardized Coefficients |            | Standardized Coefficients | t     | Sig.  |
|-------|------------------------|-----------------------------|------------|---------------------------|-------|-------|
|       |                        | B                           | Std. Error | Beta                      |       |       |
| 1     | (Constant)             | 38.058                      | 82.442     |                           | 0.462 | 0.648 |
|       | Engel                  | 6.841                       | 17.320     | 0.039                     | 0.395 | 0.696 |
|       | Interval.between.scans | 3.876                       | 6.384      | 0.057                     | 0.607 | 0.548 |
|       | Age.at.MRI             | 2.951                       | 2.276      | 0.129                     | 1.297 | 0.204 |
|       | Severity.baseline      | 30.458                      | 17.966     | 0.165                     | 1.695 | 0.100 |
|       | fL.CA.one              | 0.775                       | 0.096      | 0.801                     | 8.078 | 0.000 |

Dependent Variable: sL.presubiculum

Unstandardized Coeffi Standardiz Sig.

| Model |                        | Unstandardized Coefficients |            | Standardized Coefficients | t      | Sig.  |
|-------|------------------------|-----------------------------|------------|---------------------------|--------|-------|
|       |                        | B                           | Std. Error | Beta                      |        |       |
| 1     | (Constant)             | 9.303                       | 50.823     |                           | 0.183  | 0.856 |
|       | Engel                  | 5.722                       | 8.239      | 0.075                     | 0.695  | 0.493 |
|       | Interval.between.scans | -0.970                      | 2.943      | -0.033                    | -0.330 | 0.744 |
|       | Age.at.MRI             | -0.161                      | 1.063      | -0.016                    | -0.151 | 0.881 |
|       | Severity.baseline      | 3.326                       | 8.568      | 0.042                     | 0.388  | 0.701 |
|       | fL.presubiculum        | 0.942                       | 0.122      | 0.877                     | 7.733  | 0.000 |

Dependent Variable: sL.parasubiculum

Unstandardized Coeffi Standardiz Sig.

| Model |                        | Unstandardized Coefficients |            | Standardized Coefficients | t      | Sig.  |
|-------|------------------------|-----------------------------|------------|---------------------------|--------|-------|
|       |                        | B                           | Std. Error | Beta                      |        |       |
| 1     | (Constant)             | -1.969                      | 15.039     |                           | -0.131 | 0.897 |
|       | Engel                  | 3.031                       | 3.132      | 0.107                     | 0.968  | 0.341 |
|       | Interval.between.scans | -1.305                      | 1.162      | -0.121                    | -1.123 | 0.270 |
|       | Age.at.MRI             | -0.063                      | 0.392      | -0.017                    | -0.160 | 0.874 |
|       | Severity.baseline      | 1.982                       | 3.328      | 0.067                     | 0.596  | 0.556 |
|       | fL.parasubiculum       | 0.975                       | 0.126      | 0.820                     | 7.712  | 0.000 |

Dependent Variable: sL.molecular.layer.HP      Unstandardized Coeffi Standardiz Sig.

| Model |                        | Unstandardized Coefficients |            | Standardized Coefficients | t     | Sig.  |
|-------|------------------------|-----------------------------|------------|---------------------------|-------|-------|
|       |                        | B                           | Std. Error | Beta                      |       |       |
| 1     | (Constant)             | 52.766                      | 66.776     |                           | 0.790 | 0.435 |
|       | Engel                  | 0.879                       | 12.666     | 0.006                     | 0.069 | 0.945 |
|       | Interval.between.scans | 4.233                       | 4.677      | 0.082                     | 0.905 | 0.372 |
|       | Age.at.MRI             | 1.220                       | 1.804      | 0.070                     | 0.676 | 0.504 |
|       | Severity.baseline      | 16.008                      | 13.155     | 0.113                     | 1.217 | 0.233 |
|       | fL.molecular.layer.HP  | 0.816                       | 0.101      | 0.829                     | 8.048 | 0.000 |

Dependent Variable: sL.GC.ML.DG      Unstandardized Coeffi Standardiz Sig.

| Model |                        | Unstandardized Coefficients |            | Standardized Coefficients | t      | Sig.  |
|-------|------------------------|-----------------------------|------------|---------------------------|--------|-------|
|       |                        | B                           | Std. Error | Beta                      |        |       |
| 1     | (Constant)             | 40.027                      | 35.429     |                           | 1.130  | 0.267 |
|       | Engel                  | -1.876                      | 6.789      | -0.028                    | -0.276 | 0.784 |
|       | Interval.between.scans | 1.414                       | 2.535      | 0.054                     | 0.558  | 0.581 |
|       | Age.at.MRI             | 0.488                       | 0.930      | 0.055                     | 0.525  | 0.603 |
|       | Severity.baseline      | 8.411                       | 7.080      | 0.118                     | 1.188  | 0.244 |
|       | fL.GC.ML.DG            | 0.794                       | 0.103      | 0.818                     | 7.719  | 0.000 |

Dependent Variable: sL.CA.three      Unstandardized Coeffi Standardiz Sig.

| Model |                        | Unstandardized Coefficients |            | Standardized Coefficients | t      | Sig.  |
|-------|------------------------|-----------------------------|------------|---------------------------|--------|-------|
|       |                        | B                           | Std. Error | Beta                      |        |       |
| 1     | (Constant)             | -0.800                      | 21.388     |                           | -0.037 | 0.970 |
|       | Engel                  | 0.313                       | 5.546      | 0.004                     | 0.057  | 0.955 |
|       | Interval.between.scans | 3.389                       | 2.072      | 0.123                     | 1.635  | 0.112 |
|       | Age.at.MRI             | 1.213                       | 0.745      | 0.129                     | 1.630  | 0.113 |
|       | Severity.baseline      | 8.790                       | 5.860      | 0.116                     | 1.500  | 0.144 |
|       | fL.CA.three            | 0.810                       | 0.076      | 0.829                     | 10.589 | 0.000 |

Dependent Variable: sL.CA.four      Unstandardized Coeffi Standardiz Sig.

| Model |                        | Unstandardized Coefficients |            | Standardized Coefficients | t      | Sig.  |
|-------|------------------------|-----------------------------|------------|---------------------------|--------|-------|
|       |                        | B                           | Std. Error | Beta                      |        |       |
| 1     | (Constant)             | 26.278                      | 29.297     |                           | 0.897  | 0.377 |
|       | Engel                  | -2.172                      | 5.623      | -0.037                    | -0.386 | 0.702 |
|       | Interval.between.scans | 0.988                       | 2.113      | 0.044                     | 0.467  | 0.643 |
|       | Age.at.MRI             | 0.289                       | 0.780      | 0.038                     | 0.370  | 0.714 |
|       | Severity.baseline      | 5.241                       | 5.882      | 0.085                     | 0.891  | 0.380 |
|       | fL.CA.four             | 0.853                       | 0.104      | 0.837                     | 8.192  | 0.000 |

Dependent Variable: sL.fimbria Unstandardized Coeffi Standardiz Sig.

| Model |                        | Unstandardized Coefficients |            | Standardized Coefficients | t      | Sig.  |
|-------|------------------------|-----------------------------|------------|---------------------------|--------|-------|
|       |                        | B                           | Std. Error | Beta                      |        |       |
| 1     | (Constant)             | 24.013                      | 18.912     |                           | 1.270  | 0.214 |
|       | Engel                  | 3.565                       | 4.581      | 0.095                     | 0.778  | 0.442 |
|       | Interval.between.scans | -1.375                      | 1.701      | -0.096                    | -0.808 | 0.425 |
|       | Age.at.MRI             | 0.032                       | 0.570      | 0.007                     | 0.057  | 0.955 |
|       | Severity.baseline      | 3.885                       | 4.833      | 0.099                     | 0.804  | 0.428 |
|       | fL.fimbria             | 0.659                       | 0.105      | 0.741                     | 6.304  | 0.000 |

Dependent Variable: sL.HATA Unstandardized Coeffi Standardiz Sig.

| Model |                        | Unstandardized Coefficients |            | Standardized Coefficients | t      | Sig.  |
|-------|------------------------|-----------------------------|------------|---------------------------|--------|-------|
|       |                        | B                           | Std. Error | Beta                      |        |       |
| 1     | (Constant)             | -0.899                      | 7.758      |                           | -0.116 | 0.909 |
|       | Engel                  | 1.970                       | 1.743      | 0.112                     | 1.130  | 0.267 |
|       | Interval.between.scans | 1.421                       | 0.650      | 0.212                     | 2.185  | 0.037 |
|       | Age.at.MRI             | -0.205                      | 0.238      | -0.090                    | -0.861 | 0.396 |
|       | Severity.baseline      | 4.317                       | 1.825      | 0.236                     | 2.365  | 0.024 |
|       | fL.HATA                | 0.813                       | 0.100      | 0.844                     | 8.157  | 0.000 |

Dependent Variable: sL.Whole.hippocampus Unstandardized Coeffi Standardiz Sig.

| Model |                        | Unstandardized Coefficients |            | Standardized Coefficients | t     | Sig.  |
|-------|------------------------|-----------------------------|------------|---------------------------|-------|-------|
|       |                        | B                           | Std. Error | Beta                      |       |       |
| 1     | (Constant)             | 455.468                     | 401.400    |                           | 1.135 | 0.265 |
|       | Engel                  | 4.300                       | 72.367     | 0.006                     | 0.059 | 0.953 |
|       | Interval.between.scans | 11.515                      | 27.027     | 0.041                     | 0.426 | 0.673 |
|       | Age.at.MRI             | 9.189                       | 10.147     | 0.096                     | 0.906 | 0.372 |
|       | Severity.baseline      | 86.009                      | 75.523     | 0.111                     | 1.139 | 0.263 |
|       | fL.Whole.hippocampus   | 0.784                       | 0.103      | 0.812                     | 7.588 | 0.000 |

| <b>Patient</b> | <b>Engel</b> | <b>EEG</b>                   | <b>Seizure severity at baseline</b> |
|----------------|--------------|------------------------------|-------------------------------------|
| 1              | I            | R hemispheric                | 1                                   |
| 2              | I            | R frontal                    | 1                                   |
| 3              | I            | R fronto-central             | 2                                   |
| 4              | I            | R temporal                   | 2                                   |
| 5              | I            | R temporal                   | 2                                   |
| 6              | II           | L frontal                    | 2                                   |
| 7              | II           | R hemispheric                | 2                                   |
| 8              | II           | L inferior frontal           | 2                                   |
| 9              | II           | R temporo-parietal-occipital | 2                                   |
| 10             | II           | R temporal                   | 2                                   |
| 11             | III          | R hemispheric                | 2                                   |
| 12             | III          | L mesial parietal            | 2                                   |
| 13             | III          | L frontal                    | 2                                   |
| 14             | IV           | R frontal                    | 2                                   |
| 15             | IV           | L fronto-central             | 2                                   |
| 16             | IV           | L hemispheric                | 2                                   |
| 17             | IV           | L frontal-temporal           | 2                                   |
| 18             | IV           | R posterior temporal         | 2                                   |
| 19             | IV           | R parietal central           | 1                                   |
| 20             | IV           | L frontal                    | 1                                   |
| 21             | IV           | L frontal                    | 2                                   |
| 22             | IV           | L central midline            | 2                                   |
| 23             | IV           | R mesial frontal             | 1                                   |
| 24             | IV           | L temporal                   | 1                                   |
| 25             | IV           | L temporal                   | 2                                   |
| 26             | IV           | L parietal                   | 2                                   |
| 27             | IV           | R frontal                    | 2                                   |
| 28             | IV           | R frontal                    | 1                                   |
| 29             | IV           | R temporal                   | 2                                   |
| 30             | IV           | R frontal                    | 1                                   |
| 31             | IV           | L parietal                   | 2                                   |
| 32             | IV           | R frontal                    | 2                                   |
| 33             | IV           | L parietal                   | 1                                   |
| 34             | IV           | R frontal                    | 1                                   |
| 35             | IV           | R parietal                   | 1                                   |
| 36             | IV           | L frontal-temporal-parietal  | 2                                   |
| 37             | IV           | R frontal                    | 2                                   |

**Seizure frequency: baseline****Seizure frequency: follow up****Status epilepticus**

|                                    |                        |   |
|------------------------------------|------------------------|---|
| 1/3 months                         | No seizures for 1 year | 0 |
| 1/3 months                         | No seizures for 1 year | 0 |
| 17/day                             | No seizures for 1 year | 0 |
| 1/day                              | No seizures for 1 year | 0 |
| 3-4/week                           | No seizures for 1 year | 0 |
| few times/day                      | 1/6 months             | 0 |
| 1-2/day                            | 1-2/month              | 0 |
| 2-3/week                           | every 2 weeks          | 0 |
| 4/month                            | once/2 months          | 0 |
| 2/week                             | 1/3 months             | 0 |
| 1/week                             | Once every few weeks   | 0 |
| 2/day                              | few times/week         | 0 |
| almost daily                       | few times/week         | 0 |
| 4-6/week                           | 4-6/week               | 0 |
| 1-3/month                          | 5/day                  | 0 |
| 5/month                            | 4-5/month              | 0 |
| 5/month                            | 1/night                | 0 |
| weekly                             | daily                  | 0 |
| 1/year                             | every 2-5 weeks        | 0 |
| 1/2-3months                        | 3-4/week               | 0 |
| nightly                            | 5-6/day                | 0 |
| 1/week                             | 1/week                 | 0 |
| 1/month                            | 2-3/month              | 0 |
| 1/every 1-2 months                 | 3/month                | 0 |
| daily (2-3/night, 5-7 nights/week) | daily                  | 0 |
| daily                              | daily                  | 0 |
| 1/day                              | 1-2/day                | 0 |
| every few months                   | 5/8 months             | 0 |
| 2/month                            | 1-2/month              | 0 |
| 1/8 months                         | daily                  | 0 |
| 4-5/night                          | 4-5/night              | 0 |
| seizures at night                  | seizures at night      | 0 |
| 1/month                            | 1-2/day                | 0 |
| 2/4 months                         | few/night              | 0 |
| 1/3 months                         | 1/3 months             | 0 |
| few daily                          | few daily              | 0 |
| 3-4/night                          | 3-4/night              | 0 |



| Developmental delay | Microcephaly | R_Hippoc      | R_subiculi    | R_CA1         | R_presubi     | R_parasut     |
|---------------------|--------------|---------------|---------------|---------------|---------------|---------------|
| 0                   | 0            | 9.68          | 0.36          | -1.21         | -5.21         | 1.51          |
| 0                   | 0            | -2.66         | -3.56         | 2.52          | -5.20         | 3.18          |
| 0                   | 0            | 5.49          | 0.49          | -0.03         | -4.46         | -4.84         |
| 0                   | 0            | 2.57          | 9.45          | 14.34         | 8.24          | 1.14          |
| 1                   | 0            | -1.10         | -2.64         | -2.40         | -4.83         | -4.90         |
| 0                   | 0            | 1.44          | -2.35         | 1.04          | -8.02         | -0.75         |
| 1                   | 0            | 0.68          | -0.38         | -3.44         | -3.80         | -7.79         |
| 0                   | 0            | -7.16         | -6.71         | -9.72         | -5.20         | -4.22         |
| 0                   | 0            | 5.69          | 1.86          | 0.47          | 1.37          | 2.91          |
| 0                   | 0            | 8.05          | 22.95         | 11.22         | 38.71         | 61.01         |
| 0                   | 0            | 0.51          | -4.84         | 4.43          | -6.65         | 10.68         |
| 0                   | 0            | 1.87          | 1.48          | -4.14         | -2.28         | -2.00         |
| 1                   | 0            | 6.26          | 5.55          | 2.02          | -4.11         | -6.57         |
| 0                   | 0            | 0.04          | -0.89         | -1.64         | 2.52          | -2.54         |
| 0                   | 0            | -4.40         | -0.22         | -4.69         | 3.88          | 1.19          |
| 1                   | 0            | 0.48          | 3.41          | 0.50          | -6.08         | <b>-13.34</b> |
| 1                   | 0            | 20.08         | 16.45         | 10.15         | 18.64         | 20.30         |
| 0                   | 0            | <b>-18.19</b> | -6.52         | -1.32         | -6.21         | -3.99         |
| 0                   | 0            | 10.09         | 3.84          | -0.93         | 4.90          | 3.26          |
| 0                   | 0            | -5.08         | 4.22          | -1.75         | 0.96          | 1.30          |
| 0                   | 0            | -8.09         | -1.34         | -2.17         | 1.07          | -1.63         |
| 0                   | 0            | -2.71         | -1.73         | -3.27         | 0.93          | 4.81          |
| 0                   | 0            | -8.42         | 3.49          | 4.31          | 0.04          | -1.07         |
| 0                   | 1            | -2.77         | 1.79          | -6.44         | 1.24          | <b>-11.51</b> |
| 1                   | 0            | 1.56          | 5.36          | 0.37          | 0.91          | 8.59          |
| 0                   | 0            | -2.03         | -1.75         | 0.29          | -3.69         | -2.33         |
| 0                   | 0            | -0.60         | -3.17         | 4.59          | -3.87         | <b>-10.73</b> |
| 0                   | 0            | 1.42          | -5.15         | -0.87         | -2.20         | -4.05         |
| 0                   | 0            | <b>-18.71</b> | <b>-10.23</b> | -9.34         | <b>-15.04</b> | <b>-29.24</b> |
| 1                   | 0            | -0.04         | <b>-15.36</b> | <b>-15.25</b> | <b>-24.76</b> | <b>-51.43</b> |
| 1                   | 0            | -0.40         | 1.27          | 1.07          | 1.54          | 7.29          |
| 0                   | 0            | 8.95          | 3.22          | 2.09          | -0.30         | 5.32          |
| 0                   | 0            | <b>-10.85</b> | 4.71          | <b>-12.15</b> | 3.45          | <b>-21.69</b> |
| 0                   | 0            | -3.61         | 1.90          | -0.33         | -5.37         | -7.67         |
| 0                   | 0            | -3.84         | -6.32         | -0.89         | <b>-10.94</b> | -1.61         |
| 1                   | 0            | -1.81         | -2.50         | -1.29         | 0.66          | 3.73          |
| 0                   | 0            | -5.88         | 2.95          | 2.53          | 9.45          | <b>-10.42</b> |

| R_molecul     | R_GC-ML-      | R_CA3         | R_CA4         | R_fimbria     | R_HATA        | R_Whole_hippocamp | L_Hippoca     |
|---------------|---------------|---------------|---------------|---------------|---------------|-------------------|---------------|
| 0.11          | 2.86          | 6.17          | 1.28          | -4.94         | -6.73         | 1.46              | 1.48          |
| 1.91          | 6.00          | 0.12          | 5.22          | 4.90          | 2.99          | 0.66              | 0.60          |
| 0.74          | 0.61          | 3.61          | 0.70          | -3.15         | 0.26          | 0.71              | -0.75         |
| 12.19         | 14.07         | 16.72         | 14.23         | 16.12         | 28.42         | 11.25             | 12.68         |
| -3.56         | -6.53         | -6.77         | -7.36         | -0.46         | -0.48         | -3.54             | 5.43          |
| -1.84         | -4.57         | -3.36         | -6.27         | 13.89         | -6.32         | -1.63             | <b>-13.14</b> |
| -3.59         | -3.66         | -3.52         | -4.70         | <b>-12.84</b> | 3.58          | -2.87             | <b>-11.91</b> |
| -7.68         | -6.60         | -5.13         | -6.80         | 9.50          | -3.19         | -6.69             | -7.03         |
| 0.67          | -0.48         | 0.70          | -0.81         | -1.14         | 0.54          | 1.38              | 9.24          |
| 19.13         | 14.26         | 7.85          | 11.96         | 10.15         | <b>-18.63</b> | 17.47             | -2.36         |
| -2.73         | -7.69         | -6.52         | -8.94         | 4.19          | 4.21          | -1.97             | 0.41          |
| -3.40         | -5.07         | -2.88         | -5.57         | <b>-19.66</b> | 0.94          | -2.74             | -5.77         |
| 1.97          | 3.29          | 3.70          | 4.42          | -5.03         | 7.36          | 2.77              | 10.27         |
| -3.42         | -3.78         | -2.14         | -5.09         | <b>-22.69</b> | 5.78          | -2.05             | -2.37         |
| -0.94         | -2.05         | 1.18          | -2.15         | 19.63         | -9.00         | -1.23             | -6.52         |
| 0.19          | -5.73         | -3.72         | -7.03         | 4.48          | 4.13          | -1.08             | -1.84         |
| 13.92         | 11.03         | 6.18          | 9.30          | 21.71         | 22.29         | 14.26             | 11.19         |
| -6.33         | -8.35         | -8.17         | -8.54         | -0.40         | 3.81          | -6.81             | -9.60         |
| 0.35          | 0.44          | 1.91          | -0.02         | <b>-13.17</b> | -4.68         | 2.05              | 1.34          |
| -0.50         | 4.08          | 3.45          | 4.83          | 2.19          | 1.39          | 0.46              | 1.17          |
| -2.43         | -2.17         | -1.97         | -4.27         | -9.51         | 5.73          | -2.72             | -3.93         |
| -6.30         | -9.13         | <b>-14.55</b> | <b>-10.84</b> | -1.49         | -0.03         | -4.55             | -7.89         |
| 3.52          | 4.48          | 7.83          | 4.12          | 12.91         | 15.39         | 2.89              | 5.18          |
| -5.81         | -9.83         | -5.10         | -13.79        | -7.55         | 2.49          | -4.92             | -0.17         |
| 1.82          | -0.72         | -7.19         | -0.96         | 26.43         | 0.01          | 2.18              | -1.11         |
| -1.14         | -3.66         | -3.50         | -5.03         | -8.09         | 3.79          | -2.02             | 7.24          |
| 0.67          | -1.25         | -1.71         | -2.61         | 1.56          | 12.37         | -0.16             | 7.02          |
| -1.83         | -2.69         | -0.29         | -4.37         | 13.24         | 8.24          | -1.36             | -6.66         |
| -9.81         | -0.70         | 1.40          | -1.69         | -9.87         | <b>-10.19</b> | -9.21             | <b>-26.03</b> |
| <b>-11.68</b> | -8.42         | -7.75         | -9.38         | <b>-16.16</b> | -1.00         | <b>-12.08</b>     | -3.34         |
| 0.67          | 1.33          | 2.71          | 1.48          | 11.13         | 3.24          | 1.45              | 1.21          |
| 5.56          | 8.63          | 10.03         | 7.69          | -7.73         | -3.72         | 4.81              | 3.75          |
| -6.31         | <b>-13.81</b> | <b>-28.72</b> | <b>-12.45</b> | 28.98         | 7.38          | -6.81             | <b>-25.20</b> |
| -0.89         | -1.83         | -4.77         | -0.03         | 5.10          | -6.79         | -1.45             | -2.89         |
| -2.13         | -3.22         | <b>-10.52</b> | -4.80         | 22.30         | -9.67         | -3.73             | 6.13          |
| -0.20         | 5.33          | -2.98         | 5.49          | 3.14          | -7.10         | 0.00              | 4.90          |
| 6.63          | 11.23         | 12.45         | 11.18         | 35.17         | 6.65          | 5.48              | 10.85         |

| L_subiculi    | L_CA1         | L_presubiculi | L_parasubiculi | L_moleculi | L_GC-ML-I     | L_CA3         | L_CA4 | L_fimbria     |
|---------------|---------------|---------------|----------------|------------|---------------|---------------|-------|---------------|
| 2.81          | 1.52          | 4.63          | -0.86          | 0.26       | -4.13         | -2.13         | -5.01 | <b>-15.73</b> |
| -6.33         | -3.33         | <b>-10.80</b> | -3.94          | -2.02      | 1.57          | 3.20          | 2.43  | 7.72          |
| -0.84         | 4.66          | -5.95         | -2.77          | 1.56       | -0.66         | 2.72          | -1.07 | <b>-21.57</b> |
| 14.60         | 4.30          | 9.53          | 9.75           | 10.11      | 11.20         | 9.50          | 12.41 | 8.99          |
| -0.62         | -1.67         | -0.52         | <b>-10.45</b>  | 1.53       | 2.94          | 7.71          | 4.75  | 7.40          |
| -1.13         | 0.21          | -8.14         | 1.20           | -0.95      | 2.55          | -1.02         | 4.03  | 16.99         |
| -0.82         | -3.09         | -2.96         | -6.43          | -4.16      | -4.73         | -5.50         | -5.40 | -8.07         |
| -2.00         | -4.58         | -1.36         | 0.28           | -1.88      | 1.52          | 2.30          | 1.33  | 4.69          |
| -1.13         | 1.23          | -1.49         | 2.29           | -0.03      | -1.43         | 0.44          | -1.49 | <b>-10.78</b> |
| 1.32          | -2.35         | 0.13          | 6.23           | 0.61       | 1.92          | 0.38          | 1.01  | 7.52          |
| 1.50          | 8.85          | 0.92          | -5.21          | 5.63       | 4.54          | 3.33          | 3.58  | 10.87         |
| -1.75         | <b>-12.40</b> | -3.83         | <b>-19.30</b>  | -8.87      | -7.79         | <b>-10.17</b> | -5.32 | <b>-39.53</b> |
| 9.09          | 5.99          | 6.91          | -4.09          | 7.27       | 7.85          | 6.75          | 7.67  | 9.87          |
| 2.71          | 3.08          | 2.27          | 19.77          | 2.77       | 2.46          | 2.50          | 3.43  | -5.52         |
| -1.15         | -1.04         | -1.72         | 0.13           | -1.24      | -1.26         | 2.80          | -0.98 | 4.89          |
| -0.84         | -4.35         | -4.88         | -2.23          | -3.76      | -2.95         | -4.86         | -2.47 | -4.31         |
| 15.52         | 19.82         | 18.62         | 17.67          | 19.62      | 16.38         | 11.49         | 14.13 | 24.63         |
| -4.91         | 1.09          | -5.52         | -8.36          | -1.81      | -1.64         | -0.54         | 0.71  | -1.61         |
| 2.71          | -2.28         | 2.26          | -2.82          | -2.93      | -7.72         | -5.22         | -6.90 | -7.41         |
| 3.76          | -5.61         | 6.17          | -7.48          | -1.38      | -5.69         | -2.84         | -3.87 | -3.46         |
| -4.02         | -8.00         | -3.79         | -7.37          | -9.27      | -7.98         | -7.72         | -9.34 | 2.35          |
| -2.21         | -9.91         | -1.94         | -1.72          | -9.38      | -7.73         | <b>-20.09</b> | -9.51 | <b>-20.16</b> |
| -2.67         | 1.94          | -7.62         | -2.74          | 0.45       | 4.13          | 5.87          | 3.33  | 1.68          |
| -1.51         | 3.99          | 2.38          | 14.28          | 3.76       | 5.75          | 0.57          | 6.23  | 6.06          |
| 6.22          | 18.53         | 12.81         | 31.72          | 11.98      | 8.97          | -3.01         | 7.34  | 17.91         |
| 1.69          | 4.23          | -2.55         | 5.31           | 0.39       | 0.56          | -2.90         | -0.75 | 9.00          |
| 5.54          | 2.52          | 0.23          | 3.13           | 3.85       | 5.35          | 3.00          | 2.79  | 13.56         |
| -0.79         | -1.57         | -5.63         | -5.80          | -0.41      | 2.98          | 2.97          | 2.76  | <b>-10.86</b> |
| -8.53         | 1.67          | -6.71         | -4.28          | -1.24      | -3.89         | 3.04          | -4.91 | -4.74         |
| -1.15         | -1.79         | -6.54         | -5.49          | -1.57      | -1.57         | -1.39         | -2.08 | -8.23         |
| 2.11          | 2.41          | 0.51          | <b>-10.90</b>  | 2.07       | 0.40          | -1.31         | -0.39 | 2.60          |
| -0.81         | -2.51         | 4.09          | 3.38           | -0.55      | 3.60          | 0.42          | 0.90  | 6.60          |
| <b>-10.16</b> | <b>-15.65</b> | 1.67          | <b>-11.30</b>  | -5.82      | <b>-11.62</b> | <b>-19.27</b> | -7.23 | 2.71          |
| 2.28          | 2.85          | 0.37          | 7.58           | 1.22       | 0.76          | 1.57          | 0.90  | 16.90         |
| -5.68         | -3.24         | 7.13          | 4.45           | -2.11      | 0.00          | -5.99         | 1.07  | 16.06         |
| -0.05         | -5.74         | 2.48          | 4.13           | -4.72      | -7.12         | <b>-14.47</b> | -6.25 | -4.70         |
| 4.20          | 8.61          | 11.73         | -2.19          | 10.70      | 14.26         | 17.49         | 14.45 | 17.92         |

| L_HATA        | L_Whole_hippocampus |
|---------------|---------------------|
| -7.55         | 0.07                |
| -1.30         | -2.13               |
| 9.67          | -0.05               |
| 13.63         | 10.30               |
| -0.42         | 1.53                |
| -9.30         | -2.03               |
| -7.26         | -4.84               |
| -1.90         | -2.09               |
| -8.16         | 0.87                |
| -4.05         | 0.08                |
| 10.29         | 4.32                |
| -8.41         | -8.67               |
| 8.73          | 7.63                |
| 3.10          | 2.23                |
| 1.54          | -1.60               |
| -9.28         | -3.32               |
| 25.08         | 17.01               |
| 10.06         | -2.54               |
| 4.44          | -1.67               |
| 1.89          | -0.87               |
| 0.44          | -6.38               |
| -2.44         | -8.26               |
| 0.11          | 1.13                |
| -2.72         | 2.99                |
| 7.77          | 10.48               |
| 9.67          | 2.20                |
| 5.93          | 4.38                |
| -2.50         | -1.71               |
| 21.05         | -5.54               |
| <b>-10.09</b> | -2.78               |
| 11.24         | 1.31                |
| 16.54         | 1.28                |
| -1.79         | <b>-11.51</b>       |
| -3.47         | 1.47                |
| -8.83         | 0.28                |
| <b>-15.94</b> | -2.88               |
| -8.42         | 10.45               |
